# Supplementary material
Source: PubMed Central journal article supplement (PMC8528033)
Supplement: NIHMS1708496-supplement-Supporting_Information.pdf [file NIHMS1708496-supplement-Supporting_Information.pdf]

## **A Signaling-Biased and Constitutively Active Dopamine D2 Receptor Variant**

Dayana Rodriguez-Contreras, Alec F. Condon, David C. Buck, Naeem Asad, Timothy M. Dore,  
Dineke S. Verbeek, Marina A.J. Tijssen, Ujwal Shinde, John T. Williams, and Kim A. Neve\*

**Dayana Rodriguez-Contreras** - Research Service, VA Portland Health Care System, and Department of Behavioral Neuroscience, Oregon Health & Science University, Portland, Oregon 97239, United States

**Alec F. Condon** - Vollum Institute, Oregon Health & Science University, Portland, Oregon 97239, United States

**David C. Buck** - Research Service, VA Portland Health Care System, Portland, Oregon 97239, United States

**Naeem Asad** – New York University Abu Dhabi, Saadiyat Island, PO Box 129188, Abu Dhabi, United Arab Emirates

**Timothy M. Dore** – New York University Abu Dhabi, Saadiyat Island, PO Box 129188, Abu Dhabi, United Arab Emirates

**Dineke S. Verbeek** – Expertise Center Movement Disorders and Department of Genetics, University of Groningen, 9700 AB Groningen, The Netherlands

**Marina A.J. Tijssen** – Expertise Center Movement Disorders and Department of Neurology, University of Groningen, 9700 AB Groningen, The Netherlands

**Ujwal Shinde** - Department of Chemical Physiology & Biochemistry, Oregon Health & Science University, Portland, Oregon 97239, United States

**John T. Williams** - Vollum Institute, Oregon Health & Science University, Portland, Oregon 97239, United States

**Kim A. Neve** - Research Service, VA Portland Health Care System, and Department of Behavioral Neuroscience, Oregon Health & Science University, Portland, Oregon 97239, United States

### **Supporting Information for Publication:**

Table S1  $B_{max}$  values for HEK293 studies

Table S2 Regression analyses for Compound 101 experiment – comparison of +/- GRK2 and D2-WT vs. D2-I<sup>212</sup>F

Figure S1 Arrestin recruitment with matched receptor expression levels for D2<sub>L</sub>-WT and D2<sub>L</sub>-I<sup>212</sup>F

Figure S2 Concentration-response curves for arrestin recruitment and comparison of +/- Compound 101

Figure S3 Quinpirole competition binding curves

**Table S1.** D2 receptor density in HEK293 cells

| Receptor                            | Arrestin Recruitment<br>(No GRK) |   | G $\alpha$ o Activation |   | G $\alpha$ i Activation    |   |
|-------------------------------------|----------------------------------|---|-------------------------|---|----------------------------|---|
|                                     | B <sub>max</sub>                 | N | B <sub>max</sub>        | N | B <sub>max</sub>           | N |
| D2 <sub>L</sub> -WT                 | 2.6 ± 0.5                        | 7 | 2.3 ± 0.5               | 7 | 2.3 ± 0.8                  | 2 |
| D2 <sub>L</sub> -I <sup>212</sup> F | 0.9 ± 0.1*                       | 6 | 1.1 ± 0.2**             | 7 | 1.0 ± 0.2                  | 2 |
| D2 <sub>S</sub> -WT                 | 2.5 ± 0.3                        | 3 | 4.6 ± 1.0               | 7 | 3.2 ± 0.6 <sup>a</sup>     | 3 |
| D2 <sub>S</sub> -I <sup>212</sup> F | 1.0 ± 0.01                       | 2 | 2.3 ± 0.5**             | 7 | 1.1 ± 0.2 <sup>a,***</sup> | 3 |

For most experiments included in Tables 1 and 2, replicate plates were prepared for analysis of receptor density. B<sub>max</sub> values (Mean ± S.E.M., pmol/mg of membrane protein) were determined by saturation analysis of the binding of [<sup>3</sup>H]spiperone to a crude membrane fraction. In some BRET experiments, the number of cells was not sufficient to start replicate plates for binding. In some experiments, the number of replications (N) for radioligand binding was greater than the number of replications of the G protein activation and arrestin recruitment assays because results from replicate plates of both donor-only and donor+acceptor conditions were included as separate measurements. <sup>a</sup>from van der Weijden et al. (8). Student's *t*-test: \*p<0.05; \*\*p<0.01; \*\*\*p<0.001 compared to D2-WT. No statistical comparison of means was carried out for groups with N = 2.

**Table S2.** Arrestin recruitment: Cmpd101 pretreatment

| Receptor<br>D2 <sub>L</sub> | Arrestin Recruitment<br>(n=3) |                                          |                                |                                              |
|-----------------------------|-------------------------------|------------------------------------------|--------------------------------|----------------------------------------------|
|                             | -LogEC <sub>50</sub>          |                                          | E <sub>max</sub> (% of WT+GRK) |                                              |
|                             | +GRK2                         | No GRK2                                  | +GRK2                          | No GRK2                                      |
| WT Vehicle                  | 7.8 ± 0.02                    | 6.8 ± 0.02 <sup>††</sup>                 | 100 ± 2                        | 61 ± 3 <sup>††</sup>                         |
| I212F Vehicle               | 8.2 ± 0.03*                   | 7.2 ± 0.04 <sup>**</sup> , <sup>††</sup> | 55 ± 2 <sup>***</sup> (-45%)   | 19 ± 1 <sup>***</sup> , <sup>††</sup> (-69%) |
| WT Cmpd101                  | 6.9 ± 0.03                    | 6.7 ± 0.04                               | 28 ± 2                         | 17 ± 1 <sup>††</sup>                         |
| I212F Cmpd101               | 7.5 ± 0.04 <sup>***</sup>     | 7.3 ± 0.2 <sup>***</sup>                 | 12 ± 1 <sup>***</sup> (-57%)   | 6 ± 1 <sup>***</sup> (-65%)                  |

HEK293 cells were pretreated with vehicle or the GRK2/3 inhibitor Cmpd101 (30 μM), 30 min before adding quinpirole and coelenterazine *h*. Data are presented as mean ± SEM. E<sub>max</sub> was calculated as described in Table 1, and is expressed as a percentage of E<sub>max</sub> for D2<sub>L</sub>-WT with added GRK2. For D2-I<sup>212</sup>F, the percent reduction compared to the corresponding D2-WT E<sub>max</sub> is included in parentheses. N = 3 independent experiments for each condition. B<sub>max</sub> values (pmol/mg protein) were 1.68 ± 0.08 (D2<sub>L</sub>-WT, no GRK2), 0.57 ± 0.03 (D2<sub>L</sub>-I<sup>212</sup>F, no GRK2), 2.27 ± 0.16 (D2<sub>L</sub>-WT, + GRK2), and 0.93 ± 0.25 (D2<sub>L</sub>-I<sup>212</sup>F, + GRK2). Statistical differences were calculated by 2-way ANOVA followed by Turkey's post-hoc test (\*p<0.05, \*\*p<0.01, \*\*\*p<0.001 compared to the corresponding D2-WT condition; ††p<0.01, †††p<0.001 compared to the corresponding + GRK2 condition).

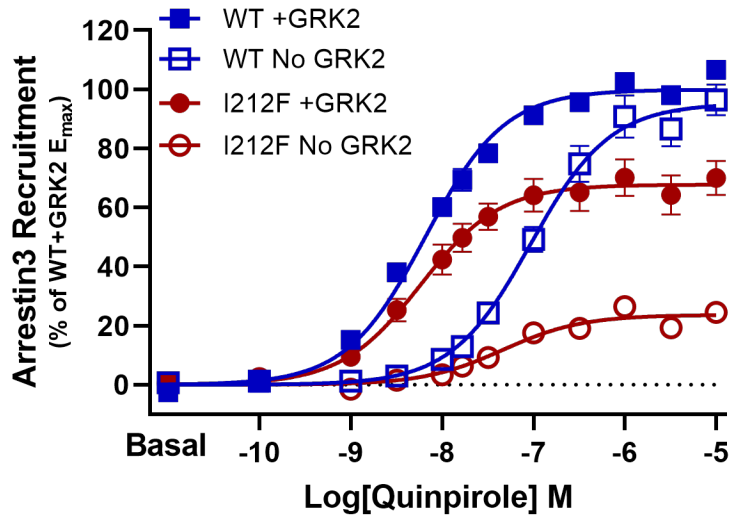

**Figure S1. Arrestin recruitment with matched receptor expression levels.** Arrestin3

recruitment was measured in HEK293 cells co-transfected with D2<sub>L</sub>-WT (50 ng plasmid DNA) or D2<sub>L</sub>-I<sup>212</sup>F (250 ng plasmid DNA) and with GRK2 (+GRK2) or nonspecific plasmid DNA (No GRK2). Values plotted are the means  $\pm$  SD of 3-4 independent experiments performed in quadruplicate. Data from each independent experiment were normalized by subtracting the baseline and expressed as a percentage of maximum arrestin3 recruitment by D2-WT+GRK2. D2 receptor B<sub>max</sub> values were  $0.46 \pm 0.05$  pmol/mg protein (D2-WT, No GRK2),  $0.48 \pm 0.04$  pmol/mg (D2-WT, +GRK2),  $0.55 \pm 0.01$  pmol/mg (D2-I<sup>212</sup>F, No GRK2), and  $0.54 \pm 0.07$  pmol/mg (D2-I<sup>212</sup>F, +GRK2). Omitting overexpressed GRK2 decreased arrestin recruitment for D2-I<sup>212</sup>F by 65%, whereas there was no significant effect of omitting GRK2 on maximal response for D2-WT at this lower level of expression. On the other hand, the potency of quinpirole at D2-WT decreased from 6 nM in the presence of GRK2 to 100 nM in the absence of GRK2, and at D2-I<sup>212</sup>F from 6 nM to 50 nM.

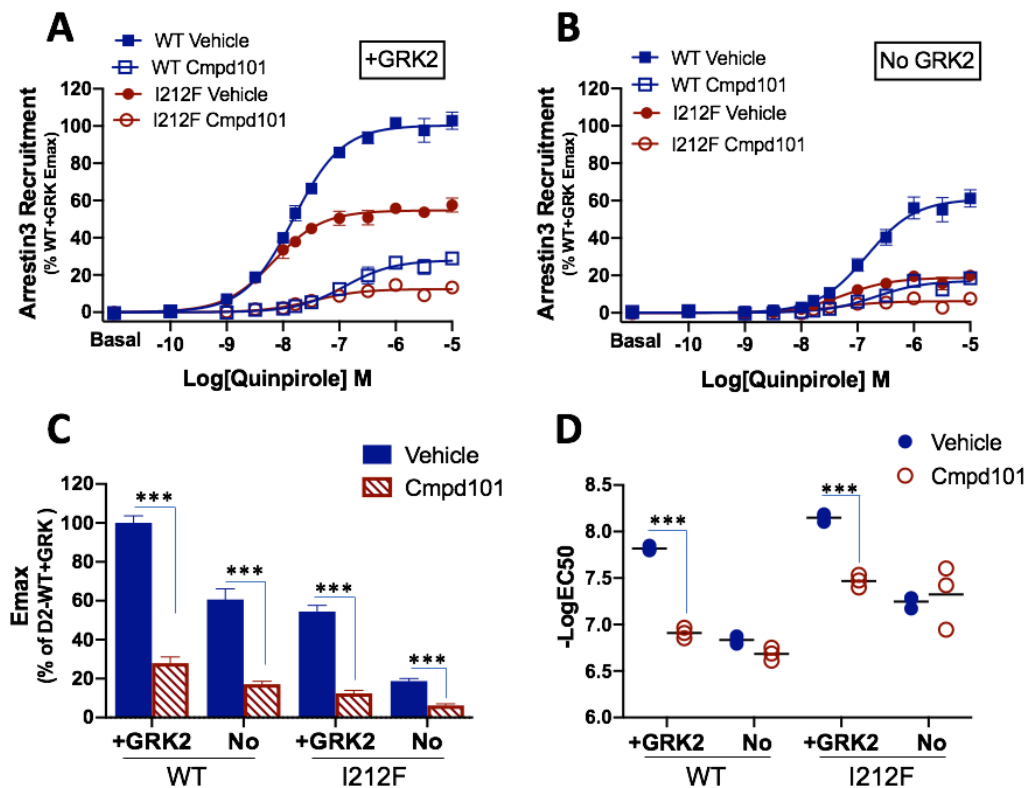

**Figure S2. Effect of Cmpd101 on Arrestin3 recruitment by D2<sub>L</sub>.** Arrestin3 recruitment was measured in HEK293 cells co-transfected with GRK2 (+GRK2) or nonspecific plasmid DNA (No GRK2) and pretreated with vehicle or the GRK2/3 inhibitor Cmpd101 (30  $\mu$ M, 30 min). **A and B**, quinpirole concentration-response curves for D2<sub>L</sub>-WT (WT) or D2<sub>L</sub>-I<sup>1212</sup>F (I212F) with GRK2 (**A**) or in the absence of overexpressed GRK2 (**B**). Data from each independent experiment were normalized by subtracting the baseline and expressed as a percentage of maximum arrestin3 recruitment by D2-WT +GRK2. Values plotted are the means  $\pm$  SD of 3 independent experiments performed in quadruplicate. **C and D**, values from Table S2 for D2<sub>L</sub>-WT (WT) or D2<sub>L</sub>-I<sup>1212</sup>F (I212F) with (+GRK2) or without (No) GRK2, in the presence (Cmpd101) or absence (vehicle) of Compound 101. **C**, E<sub>max</sub>, expressed as the percentage of E<sub>max</sub> for D2-WT with GRK2, and **D**, quinpirole potency, expressed as the  $-\text{LogEC}_{50}$ . Statistical differences determined as described in Table S2 (\*\*\*)  $p < 0.001$ ).

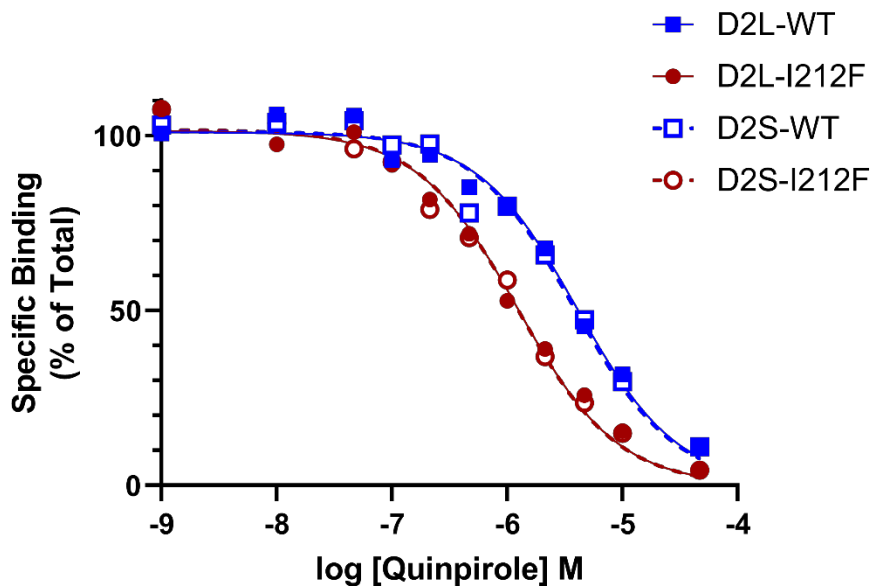

**Figure S3. Quinpirole competition binding curves.** Representative curves are shown for inhibition of the binding of [<sup>3</sup>H]spiperone (87 pM) by various concentrations of quinpirole in membranes prepared from HEK293 cells stably expressing each of the variants.  $K_i$  values in this experiment were 1.24  $\mu$ M (D2<sub>L</sub>-WT), 0.35  $\mu$ M (D2<sub>L</sub>-I<sup>212</sup>F), 1.19  $\mu$ M (D2<sub>S</sub>-WT), and 0.39  $\mu$ M (D2<sub>S</sub>-I<sup>212</sup>F). The leftward shift in the quinpirole competition curves for D2<sub>L/S</sub>-I<sup>212</sup>F relative to D2<sub>L/S</sub>-WT indicates that the mutation increased the affinity of the D2 receptor for that agonist, consistent with many studies of constitutively active GPCRs.
